# Supplementary material for: Objective Evaluation of Risk Factors for Radiation Dermatitis in Whole-Breast Irradiation Using the Spectrophotometric L*a*b Color-Space
Source: MDPI journal article supplement (doi:10.3390/cancers12092444), 2020-08-28
Supplement: s1 [file s1]

# Supplementary Materials: Objective Evaluation of Risk Factors for Radiation Dermatitis in Whole-Breast Irradiation Using the Spectrophotometric L\*a\*b Color-Space

Alexander M. C. Böhner, David Koch, Frederic Carsten Schmeel, Fred Röhner, Felix Schoroth, Gustavo R. Sarria, Alina-Valik Abramian, Brigitta Gertrud Baumert, Frank Anton Giordano and Leonard Christopher Schmeel

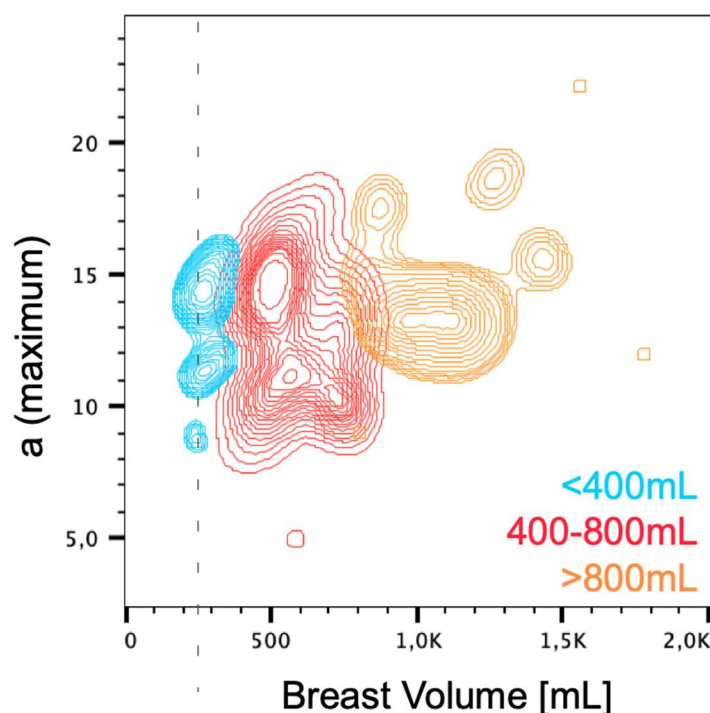

**Figure S1.** Skew value-to-effect distribution pattern for breast volume and maximum  $a^*$  values. Subgroups are colored in blue (breast volume < 400 mL), red (breast volume 400–800 mL) and orange (breast volume > 800 mL). Contour blot with isodose-lining at 5%.

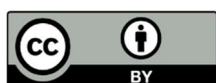

© 2020 by the authors. Licensee MDPI, Basel, Switzerland. This article is an open access article distributed under the terms and conditions of the Creative Commons Attribution (CC BY) license (<http://creativecommons.org/licenses/by/4.0/>).
